# Supplementary material
Source: publisher figshare collection journal article supplement (https://karger.figshare.com/ndownloader/files/36508674)
Supplement: Supplementary file 1 [file 36508674]

## Sheet: Sheet1
Supplementary Table 1 Remarkably differentially expressed miRNAs
miRNAs	logFC	AveExpr	t	P.Value	adj.P.Val	B
hsa-miR-1343-3p	2.58986	7.67052	144.268	0	0	3512.01
hsa-miR-5100	3.37387	11.9604	115.621	0	0	2836
hsa-miR-6784-5p	-1.71108	12.0688	-110.485	0	0	2704.45
hsa-miR-8073	2.03141	7.00064	104.952	0	0	2559.06
hsa-miR-663a	1.58856	11.4044	103.611	0	0	2523.25
hsa-miR-4258	1.8215	9.40367	88.5672	0	0	2106.29
hsa-miR-6875-5p	-1.86628	8.54175	-84.0874	0	0	1976.97
hsa-miR-4525	2.92016	9.58839	77.582	0	0	1785.43
hsa-miR-6131	4.43064	9.49621	76.7809	0	0	1761.57
hsa-miR-4454	2.14588	10.4972	75.4353	0	0	1721.36
hsa-miR-4532	2.37673	12.2463	73.4487	0	0	1661.73
hsa-miR-614	2.32367	9.07952	73.4483	0	0	1661.71
hsa-miR-575	-3.75695	6.08992	-72.3932	0	0	1629.92
hsa-miR-3184-5p	-3.11815	6.77777	-71.7877	0	0	1611.64
hsa-miR-1246	6.23376	6.03225	70.8675	0	0	1583.81
hsa-miR-887-3p	-1.9769	6.92278	-70.8187	0	0	1582.34
hsa-miR-4730	-2.34467	8.54054	-69.5173	0	0	1542.89
hsa-miR-7110-5p	-2.42452	6.94857	-68.8594	0	0	1522.91
hsa-miR-8059	1.892	9.38752	67.609	0	0	1484.87
hsa-miR-4708-3p	3.07515	6.9472	67.3519	0	0	1477.04
hsa-miR-29b-3p	4.52731	2.70127	67.1869	0	0	1472.02
hsa-miR-6825-5p	-2.65198	6.42134	-67.0487	0	0	1467.81
hsa-miR-125a-3p	-4.43781	4.81665	-66.775	0	0	1459.47
hsa-miR-92a-2-5p	-2.48075	8.50792	-66.6847	0	0	1456.71
hsa-miR-1290	5.44931	6.64916	66.6563	0	0	1455.85
hsa-miR-191-5p	4.60103	4.01112	64.5329	0	0	1391.04
hsa-miR-4481	-4.35259	3.29997	-63.7354	0	0	1366.66
hsa-miR-29b-1-5p	4.32551	1.49588	61.027	0	0	1283.81
hsa-miR-4718	3.52625	6.58177	60.91	0	0	1280.23
hsa-miR-451a	4.77832	6.19656	59.9818	0	0	1251.83
hsa-miR-2467-3p	2.86236	7.53093	59.0314	0	0	1222.76
hsa-miR-125b-1-3p	-4.51114	2.5432	-58.9714	0	0	1220.93
hsa-miR-124-3p	3.61158	2.76437	58.477	0	0	1205.81
hsa-miR-6857-5p	-3.98007	4.273	-57.9621	0	0	1190.08
hsa-miR-4448	2.61221	7.37767	57.1794	0	0	1166.17
hsa-miR-6717-5p	2.11749	6.72663	56.8928	0	0	1157.42
hsa-miR-7114-5p	-1.51767	7.32131	-56.1965	0	0	1136.18
hsa-miR-17-3p	3.08512	3.903	55.316	0	0	1109.36
hsa-miR-4783-3p	1.82833	6.94567	55.2714	0	0	1108
hsa-miR-6848-5p	-1.51866	7.08836	-55.0726	0	0	1101.95
hsa-miR-7845-5p	-1.66314	6.49441	-54.3216	0	0	1079.11
hsa-miR-4727-3p	2.61787	4.86387	53.5343	0	0	1055.21
hsa-miR-4771	3.77234	3.79966	53.3802	0	0	1050.54
hsa-miR-873-3p	-3.36231	3.25328	-53.3145	0	0	1048.55
hsa-miR-8071	-1.86878	6.4239	-53.2323	0	0	1046.06
hsa-miR-4276	-3.49188	4.30277	-53.1747	0	0	1044.31
hsa-miR-3192-5p	3.49216	0.754511	53.0723	0	0	1041.21
hsa-miR-4515	2.54773	5.18712	52.8113	0	0	1033.31
hsa-miR-4648	-3.65155	4.06731	-52.7124	0	0	1030.31
hsa-miR-6870-5p	-1.59166	7.0042	-52.5793	0	0	1026.29
hsa-miR-6780a-3p	-3.24905	1.21418	-52.4164	0	0	1021.36
hsa-miR-3194-3p	3.59324	6.45172	52.4063	0	0	1021.06
hsa-miR-23b-3p	3.45194	4.92105	51.529	0	0	994.564
hsa-miR-4740-5p	2.66132	4.8042	51.3133	0	0	988.064
hsa-miR-4710	2.45835	7.03692	51.1244	0	0	982.375
hsa-miR-23a-3p	3.12745	5.02938	50.6009	0	0	966.626
hsa-miR-1307-3p	1.82166	6.80575	50.4744	0	0	962.825
hsa-miR-6889-5p	-1.56273	7.1073	-50.3965	0	0	960.485
hsa-miR-4480	3.70878	4.15346	50.3788	0	0	959.954
hsa-miR-1587	-3.10131	3.91936	-49.9691	0	0	947.659
hsa-miR-1273c	-3.24136	2.13268	-49.6675	0	0	938.622
hsa-miR-1203	-2.78963	5.43346	-49.5061	0	0	933.792
hsa-miR-342-5p	1.64579	5.26684	49.2856	0	0	927.195
hsa-miR-4755-3p	3.83922	3.24127	49.064	0	0	920.574
hsa-miR-134-3p	-3.20175	2.45714	-48.728	0	0	910.545
hsa-miR-5090	-1.54619	7.01897	-48.3043	0	0	897.923
hsa-miR-2277-5p	-3.07593	2.46038	-48.2547	0	0	896.447
hsa-miR-8060	3.09592	3.22918	48.0624	0	0	890.726
hsa-miR-668-5p	2.24024	4.07807	47.956	0	0	887.565
hsa-miR-4732-5p	2.20587	5.76043	47.8538	0	0	884.529
hsa-miR-6127	-3.08312	3.26273	-47.7899	0	0	882.633
hsa-miR-6787-3p	-3.06641	2.67174	-47.7463	0	0	881.337
hsa-miR-6788-3p	-3.08847	2.23372	-47.6645	0	0	878.91
hsa-miR-22-3p	2.94979	4.79359	47.622	0	0	877.65
hsa-miR-6813-5p	-2.43591	5.16672	-47.595	0	0	876.849
hsa-miR-6770-3p	-3.04921	3.24003	-47.4095	0	0	871.351
hsa-miR-30b-3p	-3.25238	2.63587	-47.1443	0	0	863.497
hsa-miR-3688-5p	3.30314	0.783251	46.9729	0	0	858.428
hsa-miR-3160-5p	2.48425	5.82999	46.5197	0	0	845.05
hsa-miR-320e	3.31158	2.56975	46.3055	0	0	838.737
hsa-miR-4635	2.74808	3.53332	46.2696	0	0	837.681
hsa-miR-6760-5p	2.57171	3.97372	46.1559	0	0	834.333
hsa-miR-1236-5p	-2.94425	4.09183	-45.8449	0	0	825.192
hsa-miR-769-3p	-3.09619	2.12001	-45.7468	0	0	822.313
hsa-miR-4259	2.26527	4.65648	45.7262	0	0	821.709
hsa-miR-103a-3p	3.73857	2.3306	45.6671	0	0	819.974
hsa-miR-6751-5p	-3.14419	2.32156	-45.5915	0	0	817.755
hsa-miR-6754-3p	-3.06964	2.71448	-45.3933	0	0	811.948
hsa-miR-1231	-1.6371	6.55412	-45.2744	0	0	808.469
hsa-miR-6794-3p	-2.83685	2.73712	-44.7299	0	0	792.562
hsa-miR-6748-3p	-2.85561	2.77683	-44.6229	0	0	789.444
hsa-miR-920	1.97767	5.29099	44.1895	0	0	776.836
hsa-miR-6750-3p	-2.86735	3.26418	-43.7766	0	0	764.861
hsa-miR-6831-5p	-2.58455	4.31825	-43.7639	0	0	764.495
hsa-miR-6740-3p	-2.89023	2.24447	-43.76	0	0	764.38
hsa-miR-128-1-5p	-1.62637	6.57601	-43.7576	0	0	764.31
hsa-miR-6761-3p	-2.84864	2.48184	-43.7126	0	0	763.008
hsa-miR-6779-3p	-2.73475	3.13917	-43.5206	0	0	757.454
hsa-miR-6786-3p	-2.57499	3.85119	-43.3051	0	0	751.229
hsa-miR-320b	1.73009	4.85127	43.2877	0	0	750.729
hsa-miR-4529-5p	3.16208	1.66101	43.1731	0	0	747.424
hsa-miR-6826-3p	-2.61119	3.04033	-43.1431	0	0	746.557
hsa-miR-4290	-2.73771	2.76647	-42.8503	0	0	738.13
hsa-miR-508-5p	-2.9784	2.01171	-42.438	1.10670704668439e-321	1.52616878000361e-320	726.292
hsa-miR-135a-3p	-2.01987	6.40518	-42.2898	7.73904427645729e-320	1.06152968402867e-318	722.05
hsa-miR-6894-3p	-2.70863	3.91717	-41.9491	1.31897928821308e-315	1.78062203908766e-314	712.312
hsa-miR-4666a-5p	3.06558	0.766139	41.7382	5.42123085286999e-313	7.28034405110438e-312	706.296
hsa-miR-654-5p	2.13689	3.81947	41.7217	8.65700967004359e-313	1.15652238560748e-311	705.828
hsa-miR-3605-3p	-2.68867	2.28028	-41.5869	4.03529986744816e-311	5.36297624870703e-310	701.988
hsa-miR-6809-3p	-2.72037	2.05254	-41.5182	2.84841275388625e-310	0	700.035
hsa-miR-6893-3p	-2.55364	3.53671	-41.2732	3.01108e-307	3.94053e-306	693.076
hsa-miR-6501-5p	-3.05771	2.36431	-41.2419	7.30785e-307	9.51504e-306	692.189
hsa-miR-92a-3p	1.61694	6.2884	41.0936	4.9022e-305	6.35058e-304	687.986
hsa-miR-4476	-1.70758	6.28423	-40.925	5.80801e-303	7.44877e-302	683.213
hsa-miR-6772-3p	-2.72216	1.48544	-40.833	7.83294e-302	9.94628e-301	680.613
hsa-miR-6882-3p	-2.74177	2.50747	-40.7135	2.29537e-300	2.9003e-299	677.237
hsa-miR-4700-5p	2.88612	1.52073	40.2676	6.57518e-295	8.14751e-294	664.679
hsa-miR-3928-5p	-2.61312	2.45231	-40.197	4.77295e-294	5.88588e-293	662.698
hsa-miR-151a-5p	2.81734	0.490904	40.119	4.26953e-293	5.23987e-292	660.508
hsa-miR-92b-3p	1.94145	4.98653	40.107	5.97669e-293	7.3001e-292	660.172
hsa-miR-3713	-2.7625	1.50797	-39.9703	2.76859e-291	3.36561e-290	656.338
hsa-miR-6501-3p	2.60424	3.16893	39.5246	7.19008e-286	8.53823e-285	643.878
hsa-miR-1825	-2.48269	3.42082	-39.4626	4.05559e-285	4.79382e-284	642.149
hsa-miR-564	-2.15768	4.4386	-39.3693	5.47223e-284	6.43866e-283	639.548
hsa-miR-4507	-1.76752	5.44271	-38.9775	2.94399e-279	3.40151e-278	628.662
hsa-miR-4479	-2.35184	3.57714	-38.9633	4.37256e-279	5.02942e-278	628.266
hsa-miR-6741-3p	-2.33571	3.78756	-38.7978	4.29063e-277	4.89132e-276	623.683
hsa-miR-6747-3p	-2.37646	3.27492	-38.6728	1.36575e-275	1.55007e-274	620.224
hsa-miR-4652-5p	2.86167	2.26439	38.5738	2.10355e-274	2.37691e-273	617.491
hsa-miR-6883-3p	-2.50186	1.90369	-38.5054	1.39225e-273	1.56628e-272	615.603
hsa-miR-6073	3.25828	2.32954	38.4094	1.96549e-272	2.20152e-271	612.957
hsa-miR-6804-3p	-2.24231	4.24261	-38.3869	3.66047e-272	4.08222e-271	612.335
hsa-miR-6886-3p	-2.42798	3.94104	-38.3863	3.72034e-272	4.13103e-271	612.319
hsa-miR-1304-3p	-2.49626	1.86767	-38.2229	3.34767e-270	3.70119e-269	607.822
hsa-miR-4633-3p	3.12952	2.8269	38.1655	1.62473e-269	1.7886e-268	606.244
hsa-miR-4423-5p	2.872	1.04712	37.9933	1.84063e-267	2.00902e-266	601.517
hsa-miR-877-3p	-2.09497	3.99124	-37.9463	6.68256e-267	7.23239e-266	600.228
hsa-miR-935	-2.42248	2.74678	-37.8956	2.67954e-266	2.88782e-265	598.84
hsa-miR-3173-5p	-2.6189	1.86558	-37.7635	1.00007e-264	1.0733e-263	595.223
hsa-miR-6778-3p	-2.51885	1.94236	-37.5155	8.7818e-262	9.38555e-261	588.449
hsa-miR-3692-5p	-2.55275	1.27843	-37.3938	2.42306e-260	2.55767e-259	585.134
hsa-miR-6861-3p	-2.10564	3.99655	-37.3636	5.52111e-260	5.80395e-259	584.311
hsa-miR-1199-3p	-2.49122	2.7206	-37.3358	1.1755e-259	1.23067e-258	583.556
hsa-miR-4722-3p	-2.34385	3.52687	-37.2925	3.82112e-259	3.98422e-258	582.378
hsa-miR-5088-5p	-2.31164	3.34219	-37.2766	5.8973e-259	6.12412e-258	581.944
hsa-miR-6885-3p	-2.22161	3.56537	-37.2359	1.78191e-258	1.83559e-257	580.839
hsa-miR-378f	-2.49529	1.19598	-37.1986	4.91028e-258	5.03795e-257	579.826
hsa-miR-6820-3p	-2.33325	2.95759	-37.1547	1.623e-257	1.65856e-256	578.631
hsa-miR-4757-5p	2.83388	1.94674	37.1403	2.39908e-257	2.44192e-256	578.241
hsa-miR-433-5p	-2.79898	1.51106	-37.0941	8.41257e-257	8.52895e-256	576.987
hsa-miR-6762-3p	-2.49298	1.49513	-36.9991	1.10514e-255	1.11601e-254	574.413
hsa-miR-5002-3p	-2.38476	1.14246	-36.7814	4.0127e-253	4.00489e-252	568.522
hsa-miR-3191-5p	-2.45476	1.80778	-36.4221	6.50473e-249	6.41717e-248	558.835
hsa-miR-4748	-2.45385	2.46981	-36.3904	1.52857e-248	1.50222e-247	557.982
hsa-miR-107	2.90599	2.7394	36.3494	4.60857e-248	4.51183e-247	556.879
hsa-miR-3192-3p	-2.36538	2.57073	-35.9134	5.50292e-243	5.30639e-242	545.197
hsa-miR-4478	-2.13567	4.04789	-35.8877	1.09158e-242	1.04866e-241	544.512
hsa-miR-4435	-2.39498	4.81767	-35.8539	2.6978e-242	2.58204e-241	543.608
hsa-miR-6753-3p	-2.4399	1.62587	-35.8301	5.09733e-242	4.86046e-241	542.972
hsa-miR-7110-3p	-2.2843	3.32943	-35.7562	3.6583e-241	3.47539e-240	541.003
hsa-miR-449b-3p	-2.21261	3.67346	-35.5925	2.8737e-239	2.70002e-238	536.642
hsa-miR-6827-3p	-2.3113	1.9421	-35.4273	2.32115e-237	2.15716e-236	532.253
hsa-miR-4434	2.80594	1.55055	35.3869	6.7766e-237	6.27508e-236	531.183
hsa-miR-650	1.99135	3.83692	35.3542	1.61459e-236	1.48972e-235	530.315
hsa-miR-6810-3p	-2.02448	3.59729	-35.2826	1.07639e-235	9.89581e-235	528.419
hsa-miR-3184-3p	-2.37082	3.0587	-35.2175	6.04083e-235	5.53383e-234	526.696
hsa-miR-6790-3p	-1.90627	4.64443	-34.9044	2.36592e-231	2.12188e-230	518.429
hsa-miR-6775-3p	-2.29688	2.57762	-34.7269	2.53043e-229	2.25366e-228	513.76
hsa-miR-5581-5p	-2.51783	1.67224	-34.7021	4.8577e-229	4.31142e-228	513.108
hsa-miR-26b-3p	-2.25665	2.10537	-34.6683	1.1811e-228	1.04466e-227	512.221
hsa-miR-1976	-1.78018	4.90887	-34.5345	3.95061e-227	3.48224e-226	508.713
hsa-miR-4685-3p	-2.12531	4.06025	-34.4857	1.41871e-226	1.24623e-225	507.436
hsa-miR-6776-3p	-2.33944	2.67372	-34.4697	2.15529e-226	1.8868e-225	507.018
hsa-miR-4269	-2.19417	3.18168	-34.4584	2.89804e-226	2.52839e-225	506.722
hsa-miR-4663	2.57032	3.60906	34.4578	2.94821e-226	2.56345e-225	506.705
hsa-miR-3194-5p	-2.01832	4.52988	-34.3141	1.2649e-224	1.09611e-223	502.949
hsa-miR-602	-1.77422	5.23464	-34.2575	5.54271e-224	4.77082e-223	501.472
hsa-miR-3156-5p	1.73927	4.24538	34.2323	1.0696e-223	9.17569e-223	500.815
hsa-miR-4633-5p	2.41681	2.25274	34.2295	1.15192e-223	9.84892e-223	500.741
hsa-miR-642b-5p	-2.32201	1.17095	-34.0038	4.11837e-221	3.50951e-220	494.867
hsa-miR-6511a-3p	-2.03752	4.02961	-33.877	1.10898e-219	9.41901e-219	491.576
hsa-miR-6890-3p	-2.16673	3.52646	-33.8559	1.9209e-219	1.62611e-218	491.027
hsa-miR-548q	-1.77328	4.80315	-33.8393	2.95466e-219	2.493e-218	490.597
hsa-miR-1266-3p	-2.26699	1.56507	-33.709	8.62654e-218	7.18412e-217	487.226
hsa-miR-6862-3p	-1.94363	4.3842	-33.6615	2.95053e-217	2.44922e-216	485.997
hsa-miR-642a-5p	-2.17615	2.70006	-33.5471	5.67447e-216	4.69516e-215	483.043
hsa-miR-6734-5p	-2.31686	2.12678	-33.4855	2.7844e-215	2.29646e-214	481.453
hsa-miR-6511b-3p	-1.82746	4.45924	-33.3477	9.70043e-214	7.9494e-213	477.905
hsa-miR-4265	-2.17997	3.1986	-33.2649	8.14552e-213	6.63278e-212	475.779
hsa-miR-548ab	-2.21506	0.545314	-33.2571	9.96776e-213	8.09092e-212	475.578
hsa-miR-3944-3p	-2.20734	2.77984	-33.1871	6.01909e-212	4.83981e-211	473.781
hsa-miR-6773-3p	-2.33222	1.48376	-33.0747	1.07372e-210	8.5797e-210	470.902
hsa-miR-551b-5p	1.82612	4.36338	33.022	4.14443e-210	3.29116e-209	469.552
hsa-miR-6875-3p	-1.95447	3.62351	-33.0065	6.16196e-210	4.87822e-209	469.156
hsa-miR-3180-5p	-1.93097	3.95016	-32.8719	1.92142e-208	1.51179e-207	465.719
hsa-miR-6860	-1.87153	4.3715	-32.8035	1.10012e-207	8.62942e-207	463.976
hsa-miR-2682-3p	-2.18361	2.69366	-32.7221	8.77493e-207	6.8621e-206	461.901
hsa-miR-494-3p	-2.08256	3.81873	-32.7088	1.2284e-206	9.57707e-206	461.565
hsa-miR-4658	2.21853	2.80873	32.6033	1.80194e-205	1.39637e-204	458.881
hsa-miR-6756-3p	-1.56007	4.7286	-32.5897	2.54604e-205	1.96704e-204	458.536
hsa-miR-6883-5p	-2.18444	0.632865	-32.5267	1.26122e-204	9.71481e-204	456.937
hsa-miR-5010-3p	-2.15053	1.69664	-32.501	2.41913e-204	1.85781e-203	456.286
hsa-miR-6732-3p	-1.58937	4.55541	-32.4787	4.26614e-204	3.26647e-203	455.72
hsa-miR-6884-3p	-1.83085	4.01006	-32.4709	5.19781e-204	3.96797e-203	455.522
hsa-miR-6792-3p	-1.98136	4.09651	-32.4544	7.9009e-204	6.01359e-203	455.104
hsa-miR-4489	1.98526	3.64152	32.41	2.42973e-203	1.84386e-202	453.982
hsa-miR-4632-3p	-1.9241	3.7287	-32.3488	1.1464e-202	8.67411e-202	452.431
hsa-miR-6133	-2.31102	0.646598	-32.2894	5.14602e-202	3.88222e-201	450.931
hsa-miR-6821-3p	-2.26895	1.98264	-32.2241	2.6812e-201	2.0109e-200	449.282
hsa-miR-4789-5p	2.43121	1.27809	32.1695	1.06222e-200	7.94343e-200	447.906
hsa-miR-4450	-1.84548	5.41626	-32.0475	2.30268e-199	1.71697e-198	444.833
hsa-miR-4723-3p	-1.70156	4.32008	-32.0291	3.65463e-199	2.71714e-198	444.371
hsa-miR-4792	-1.51401	5.79592	-32.0017	7.28479e-199	5.40043e-198	443.682
hsa-miR-519c-5p; hsa-miR-523-5p; hsa-miR-518e-5p; hsa-miR-522-5p; hsa-miR-519a-5p; hsa-miR-519b-5p	2.31864	2.11236	31.9388	3.54198e-198	2.61821e-197	442.102
hsa-miR-7976	-2.05597	0.794358	-31.7557	3.49685e-196	2.56269e-195	437.514
hsa-miR-885-5p	-2.17216	2.11254	-31.6984	1.46956e-195	1.07391e-194	436.079
hsa-miR-4439	2.20067	2.53054	31.6462	5.41259e-195	3.94412e-194	434.777
hsa-miR-6509-3p	-2.11034	0.873268	-31.5111	1.57914e-193	1.1442e-192	431.407
hsa-miR-4653-3p	-2.10956	0.406479	-31.4197	1.53795e-192	1.1081e-191	429.133
hsa-miR-1250-3p	-2.08868	1.83503	-31.4182	1.59646e-192	1.14703e-191	429.095
hsa-miR-4732-3p	-2.14344	1.42363	-31.4021	2.38665e-192	1.70999e-191	428.694
hsa-miR-3663-5p	-1.92482	3.14896	-31.3992	2.5656e-192	1.83308e-191	428.621
hsa-miR-937-3p	-2.0926	1.60349	-31.3566	7.39774e-192	5.27089e-191	427.563
hsa-miR-1303	-2.26844	2.17798	-31.2215	2.11762e-190	1.50462e-189	424.212
hsa-miR-4780	-2.07401	1.4714	-31.1509	1.21929e-189	8.63943e-189	422.463
hsa-miR-197-3p	-1.75916	4.03636	-31.0426	1.77545e-188	1.25455e-187	419.787
hsa-miR-7702	-2.26964	1.49467	-31.0309	2.37086e-188	1.67067e-187	419.498
hsa-miR-6782-3p	-2.11739	2.75895	-31.0279	2.55296e-188	1.79407e-187	419.425
hsa-miR-6891-3p	-1.72181	3.5717	-30.9895	6.58893e-188	4.61765e-187	418.477
hsa-miR-6830-3p	-2.28482	1.8225	-30.8524	1.93794e-186	1.35445e-185	415.099
hsa-miR-6738-3p	-2.08813	1.09369	-30.7873	9.60828e-186	6.67893e-185	413.5
hsa-miR-6726-3p	-1.64228	4.62701	-30.7681	1.54378e-185	1.06733e-184	413.026
hsa-miR-7109-3p	-1.57012	4.5847	-30.7638	1.71505e-185	1.18256e-184	412.921
hsa-miR-6803-3p	-1.67455	4.54527	-30.7586	1.94879e-185	1.34012e-184	412.793
hsa-miR-887-5p	-2.29591	2.68156	-30.7581	1.97119e-185	1.3519e-184	412.782
hsa-miR-8485	-1.80573	4.25836	-30.6998	8.26457e-185	5.65297e-184	411.35
hsa-miR-6716-3p	-2.20771	1.28626	-30.6492	2.85726e-184	1.94917e-183	410.111
hsa-miR-3151-3p	-1.79748	3.959	-30.5587	2.62584e-183	1.78182e-182	407.895
hsa-miR-140-3p	2.27692	0.973791	30.5548	2.89188e-183	1.95717e-182	407.798
hsa-miR-422a	-2.08129	5.46485	-30.5324	4.99745e-183	3.37328e-182	407.252
hsa-miR-24-3p	1.51287	5.71617	30.506	9.53556e-183	6.41961e-182	406.606
hsa-miR-151b	2.5086	0.861987	30.4869	1.52094e-182	1.02126e-181	406.14
hsa-miR-29b-2-5p	2.23962	0.873008	30.472	2.18993e-182	1.46662e-181	405.776
hsa-miR-4279	-1.54575	4.68863	-30.4634	2.70072e-182	1.804e-181	405.566
hsa-miR-765	-2.10162	2.45336	-30.4012	1.23478e-181	8.22652e-181	404.048
hsa-miR-5586-3p	2.01121	-0.0737709	30.3628	3.15385e-181	2.09576e-180	403.111
hsa-miR-4740-3p	-1.78724	4.02426	-30.3555	3.7667e-181	2.49654e-180	402.934
hsa-miR-6827-5p	-1.69967	3.9364	-30.3196	9.0409e-181	5.97678e-180	402.059
hsa-miR-7152-5p	-2.09903	1.56093	-30.3101	1.13919e-180	7.51164e-180	401.828
hsa-miR-6769b-3p	-1.74253	3.46776	-30.1018	1.80277e-178	1.18263e-177	396.769
hsa-miR-6720-5p	-2.02417	1.39145	-30.087	2.58082e-178	1.68872e-177	396.41
hsa-miR-5088-3p	-1.90473	2.81582	-30.0707	3.83332e-178	2.5019e-177	396.015
hsa-miR-378a-3p	-2.05813	1.1559	-30.0165	1.42618e-177	9.28468e-177	394.703
hsa-miR-5189-3p	-1.8895	3.33797	-30.0099	1.67447e-177	1.0846e-176	394.542
hsa-miR-4444	2.03724	2.71544	29.9009	2.33877e-176	1.51107e-175	391.908
hsa-miR-6849-3p	-2.01248	2.26547	-29.8734	4.54659e-176	2.93015e-175	391.244
hsa-miR-346	-1.60469	4.3384	-29.8611	6.11147e-176	3.9288e-175	390.949
hsa-miR-320d	2.14018	2.95984	29.8577	6.64739e-176	4.26264e-175	390.865
hsa-miR-4436b-3p	2.17274	1.2585	29.8416	9.78734e-176	6.26048e-175	390.478
hsa-miR-4268	-1.88941	2.72784	-29.8382	1.06294e-175	6.78216e-175	390.396
hsa-miR-6813-3p	-1.52616	4.29972	-29.6623	7.3573e-174	4.67115e-173	386.163
hsa-miR-485-3p	-1.93361	2.11454	-29.6546	8.85294e-174	5.60686e-173	385.978
hsa-miR-6829-3p	-1.97601	3.11268	-29.638	1.32094e-173	8.34534e-173	385.578
hsa-miR-6790-5p	-1.77243	4.42142	-29.5699	6.77346e-173	4.26878e-172	383.945
hsa-miR-6892-3p	-1.57276	4.03439	-29.5491	1.11694e-172	7.02197e-172	383.446
hsa-miR-4717-3p	-1.92855	3.22912	-29.3802	6.3714e-171	3.99575e-170	379.406
hsa-miR-6812-3p	-1.86683	2.70072	-29.218	3.06085e-169	1.90099e-168	375.538
hsa-miR-4326	-2.08338	1.12471	-29.1294	2.51629e-168	1.55901e-167	373.434
hsa-miR-1273h-3p	-1.95085	1.75213	-29.1198	3.16204e-168	1.95437e-167	373.206
hsa-let-7b-3p	-1.97469	1.6874	-28.9603	1.39499e-166	8.58067e-166	369.423
hsa-miR-4296	1.9587	0.335347	28.9547	1.59031e-166	9.75871e-166	369.292
hsa-miR-4455	1.6134	4.41512	28.9335	2.62631e-166	1.60775e-165	368.791
hsa-miR-4514	1.97797	0.19299	28.9295	2.89195e-166	1.76615e-165	368.695
hsa-miR-1273h-5p	-1.9827	2.2636	-28.7754	1.1028e-164	6.70302e-164	365.058
hsa-miR-6759-3p	-1.74583	3.70974	-28.7371	2.71937e-164	1.64898e-163	364.156
hsa-miR-6742-3p	-1.97216	1.74396	-28.7116	4.96796e-164	3.00538e-163	363.554
hsa-miR-7160-5p	-1.78357	3.65168	-28.6948	7.37135e-164	4.43838e-163	363.16
hsa-miR-4754	2.13076	1.33225	28.6477	2.23563e-163	1.33981e-162	362.052
hsa-miR-6889-3p	-1.79945	3.20003	-28.6047	6.14702e-163	3.67531e-162	361.041
hsa-miR-6784-3p	-1.74444	3.49996	-28.6027	6.4414e-163	3.84237e-162	360.995
hsa-miR-6873-3p	-1.84637	0.574462	-28.5544	2.00144e-162	1.18835e-161	359.862
hsa-miR-629-3p	-2.02251	2.27756	-28.5499	2.22634e-162	1.31884e-161	359.756
hsa-miR-6867-3p	-1.60262	3.75918	-28.4228	4.38244e-161	2.58413e-160	356.78
hsa-miR-4261	1.94787	2.26867	28.3728	1.41095e-160	8.30065e-160	355.612
hsa-miR-4475	2.00871	0.446583	28.2408	3.07796e-159	1.7984e-158	352.533
hsa-miR-664b-3p	-1.93288	2.47629	-28.1982	8.29778e-159	4.83723e-158	351.542
hsa-miR-5193	-2.03709	2.37515	-28.1657	1.76922e-158	1.02904e-157	350.786
hsa-miR-4777-3p	2.0425	0.250186	28.1032	7.56626e-158	4.38091e-157	349.334
hsa-miR-6823-3p	-1.88737	3.07693	-28.0659	1.79825e-157	1.03885e-156	348.47
hsa-miR-4776-5p	1.71951	3.4159	28.0124	6.22344e-157	3.58722e-156	347.23
hsa-miR-939-3p	-1.61697	4.16167	-27.9829	1.23459e-156	7.10028e-156	346.545
hsa-miR-524-5p	2.08177	1.30359	27.9398	3.35021e-156	1.91814e-155	345.548
hsa-miR-2113	-1.79483	0.625409	-27.9164	5.74559e-156	3.28228e-155	345.009
hsa-miR-936	-1.86135	1.98372	-27.891	1.03453e-155	5.89685e-155	344.422
hsa-miR-8078	-1.9254	2.50521	-27.8705	1.66273e-155	9.45657e-155	343.948
hsa-miR-18b-3p	-1.65269	3.07349	-27.8649	1.89311e-155	1.0743e-154	343.818
hsa-miR-3649	-2.00165	1.46162	-27.8135	6.20748e-155	3.50709e-154	342.632
hsa-miR-1200	-1.83245	1.20293	-27.77	1.69085e-154	9.49021e-154	341.631
hsa-miR-8085	-1.85422	2.76061	-27.7454	2.97991e-154	1.66888e-153	341.066
hsa-miR-6071	-1.8436	0.409894	-27.6985	8.78494e-154	4.89856e-153	339.986
hsa-miR-6771-3p	-1.81607	2.32845	-27.6956	9.38728e-154	5.22308e-153	339.919
hsa-miR-6734-3p	-1.74089	2.96802	-27.6868	1.1499e-153	6.38419e-153	339.717
hsa-miR-3678-3p	-1.95705	1.86065	-27.674	1.544e-153	8.55369e-153	339.422
hsa-miR-26a-5p	2.19885	2.0368	27.6141	6.12457e-153	3.37839e-152	338.046
hsa-miR-130a-3p	2.11442	1.59177	27.4549	2.35551e-151	1.29654e-150	334.401
hsa-miR-4526	-1.50985	4.17817	-27.4482	2.743e-151	1.50659e-150	334.249
hsa-miR-6772-5p	-1.64739	3.8933	-27.3987	8.51382e-151	4.66623e-150	333.118
hsa-miR-512-5p	-1.85316	1.71168	-27.3367	3.51031e-150	1.90762e-149	331.703
hsa-miR-6751-3p	-1.94454	1.3672	-27.2398	3.19405e-149	1.72843e-148	329.497
hsa-miR-4700-3p	-1.68471	3.27069	-27.219	5.13318e-149	2.77191e-148	329.023
hsa-miR-326	-1.57938	3.61091	-27.1105	6.0325e-148	3.25071e-147	326.563
hsa-miR-4531	2.01537	0.895521	27.0949	8.60585e-148	4.62767e-147	326.208
hsa-miR-4305	-1.80367	0.851775	-27.0613	1.84312e-147	9.86974e-147	325.447
hsa-miR-6881-3p	-1.83572	1.26671	-27.022	4.48927e-147	2.39895e-146	324.558
hsa-miR-4682	-1.9252	1.19077	-26.9645	1.64719e-146	8.78387e-146	323.26
hsa-miR-6824-3p	-1.82982	2.20193	-26.8951	7.91112e-146	4.20125e-145	321.692
hsa-miR-3622a-3p	-1.68118	3.21157	-26.8701	1.38846e-145	7.35825e-145	321.131
hsa-miR-4506	-2.0602	1.32914	-26.8155	4.7629e-145	2.51893e-144	319.9
hsa-miR-487b-5p	-1.76616	2.28744	-26.8023	6.41197e-145	3.38409e-144	319.603
hsa-miR-6846-3p	-1.71193	2.72743	-26.7575	1.7575e-144	9.2377e-144	318.596
hsa-miR-7152-3p	-1.82322	1.11616	-26.7333	3.02608e-144	1.5873e-143	318.053
hsa-miR-8077	-1.85541	1.04251	-26.7125	4.82949e-144	2.52294e-143	317.586
hsa-miR-6789-3p	-1.67748	3.32889	-26.6921	7.63135e-144	3.97854e-143	317.129
hsa-miR-4795-3p	2.08112	0.924171	26.6747	1.12864e-143	5.86023e-143	316.738
hsa-miR-6857-3p	-1.79958	1.74541	-26.5095	4.56953e-142	2.35832e-141	313.042
hsa-miR-3175	-1.59096	4.00857	-26.4614	1.33627e-141	6.88261e-141	311.971
hsa-miR-6783-3p	-1.83176	1.35989	-26.4236	3.10947e-141	1.59835e-140	311.127
hsa-miR-7155-3p	-1.85806	2.07546	-26.382	7.86283e-141	4.02558e-140	310.201
hsa-miR-3714	1.83737	2.70094	26.366	1.12221e-140	5.734e-140	309.845
hsa-miR-6736-3p	-1.90412	2.14016	-26.2513	1.43856e-139	7.32124e-139	307.298
hsa-miR-4490	1.99661	0.563677	26.235	2.06462e-139	1.04866e-138	306.937
hsa-miR-574-5p	-1.90919	2.2354	-26.1575	1.15151e-138	5.83722e-138	305.221
hsa-miR-4804-3p	-1.75923	1.30254	-26.1145	2.98079e-138	1.50803e-137	304.271
hsa-miR-4312	-1.59421	3.29576	-25.9869	4.99199e-137	2.51561e-136	301.457
hsa-miR-3177-5p	-1.55679	4.07911	-25.9741	6.62921e-137	3.3341e-136	301.173
hsa-miR-139-3p	-1.63381	3.90008	-25.8951	3.77529e-136	1.89133e-135	299.436
hsa-miR-598-5p	1.90722	1.41942	25.8644	7.41344e-136	3.69951e-135	298.762
hsa-miR-5589-5p	-1.813	1.65217	-25.8192	1.99763e-135	9.91089e-135	297.772
hsa-miR-1204	-1.69676	0.653204	-25.7639	6.72029e-135	3.32771e-134	296.561
hsa-miR-7151-3p	-1.7603	1.337	-25.7194	1.78131e-134	8.78667e-134	295.587
hsa-miR-4724-3p	1.88171	0.834421	25.6134	1.80837e-133	8.86895e-133	293.273
hsa-miR-194-3p	-1.74712	1.66383	-25.5563	6.28541e-133	3.07087e-132	292.029
hsa-miR-6737-3p	-1.70633	2.06706	-25.4941	2.43634e-132	1.18806e-131	290.676
hsa-miR-4482-3p	-1.75458	2.60542	-25.445	7.08553e-132	3.44212e-131	289.61
hsa-miR-4317	1.83978	0.513922	25.4044	1.70836e-131	8.28345e-131	288.731
hsa-miR-6757-3p	-1.70662	1.02764	-25.3332	8.0104e-131	3.86216e-130	287.188
hsa-miR-183-3p	-1.86445	1.09349	-25.319	1.08794e-130	5.23557e-130	286.883
hsa-miR-133b	-1.58007	2.81962	-25.318	1.11292e-130	5.34575e-130	286.86
hsa-miR-6810-5p	-1.58544	3.36343	-25.2791	2.58155e-130	1.23539e-129	286.02
hsa-miR-5008-3p	-1.74376	1.82925	-25.2549	4.35908e-130	2.08213e-129	285.497
hsa-miR-4770	1.60199	-0.444959	25.2197	9.32892e-130	4.44771e-129	284.737
hsa-miR-4431	-1.84728	0.750736	-25.1899	1.7736e-129	8.42459e-129	284.095
hsa-miR-4708-5p	-1.53119	3.54727	-25.1261	7.01822e-129	3.32135e-128	282.722
hsa-miR-2355-5p	-1.62324	3.14723	-24.9984	1.09157e-127	5.14681e-127	279.982
hsa-let-7d-3p	-1.71029	0.990211	-24.8829	1.29578e-126	6.0762e-126	277.511
hsa-miR-542-5p	-1.7607	2.57174	-24.8221	4.7553e-126	2.2177e-125	276.213
hsa-miR-5196-3p	-1.52174	3.55564	-24.7098	5.20667e-125	2.41503e-124	273.823
hsa-miR-6799-3p	-1.70981	2.01269	-24.6649	1.35421e-124	6.25863e-124	272.869
hsa-miR-4753-5p	1.8303	0.884703	24.6081	4.52084e-124	2.08186e-123	271.665
hsa-miR-15b-5p	1.92863	1.83476	24.5931	6.21644e-124	2.85756e-123	271.347
hsa-miR-6759-5p	-1.59358	3.66408	-24.5913	6.45593e-124	2.96234e-123	271.31
hsa-miR-526a; hsa-miR-520c-5p; hsa-miR-518d-5p	1.68699	2.64196	24.5472	1.64421e-123	7.50427e-123	270.376
hsa-miR-4299	1.80418	3.18292	24.2481	9.02021e-121	4.07339e-120	264.079
hsa-miR-519d-5p	1.58976	2.59067	24.0692	3.82071e-119	1.71331e-118	260.339
hsa-miR-6728-3p	-1.55379	3.09872	-24.0556	5.07361e-119	2.26327e-118	260.056
hsa-miR-99a-5p	1.93152	1.50206	23.9732	2.82656e-118	1.25652e-117	258.341
hsa-miR-943	-1.74627	1.80348	-23.8896	1.6055e-117	7.12473e-117	256.607
hsa-miR-4694-5p	1.80451	1.15957	23.8861	1.72919e-117	7.66041e-117	256.533
hsa-miR-6852-3p	-1.55761	0.667339	-23.8376	4.72961e-117	2.08444e-116	255.528
hsa-miR-4713-3p	1.69856	1.71577	23.7148	6.00242e-116	2.63183e-115	252.991
hsa-miR-3130-5p	-1.51753	3.0162	-23.7008	8.00732e-116	3.50491e-115	252.704
hsa-miR-27b-3p	1.8543	1.31073	23.6789	1.25793e-115	5.49676e-115	252.253
hsa-miR-15a-5p	1.8262	0.807618	23.5783	1.00043e-114	4.35671e-114	250.183
hsa-miR-1207-3p	-1.69673	1.25431	-23.5752	1.06522e-114	4.63098e-114	250.12
hsa-miR-4650-3p	1.75247	1.2055	23.5278	2.82307e-114	1.22317e-113	249.147
hsa-miR-6855-5p	-1.67645	1.85241	-23.4361	1.8522e-113	7.99813e-113	247.269
hsa-miR-548b-3p	1.81477	0.62327	23.3524	1.02497e-112	4.39639e-112	245.561
hsa-miR-4538	1.71249	2.1398	23.3013	2.90764e-112	1.24509e-111	244.52
hsa-miR-3064-3p	-1.73118	0.914485	-23.228	1.29336e-111	5.5199e-111	243.03
hsa-miR-2278	-1.70757	2.09476	-23.1175	1.22027e-110	5.17353e-110	240.79
hsa-miR-3667-3p	-1.56296	0.662487	-22.9511	3.52783e-109	1.49076e-108	237.432
hsa-let-7c-5p	1.87983	1.19456	22.9154	7.23349e-109	3.05163e-108	236.715
hsa-miR-615-3p	-1.51996	2.53983	-22.9036	9.1808e-109	3.86045e-108	236.477
hsa-miR-5581-3p	-1.54021	1.19707	-22.8116	5.83482e-108	2.44149e-107	234.631
hsa-miR-298	1.64167	1.509	22.6953	5.9919e-107	2.48291e-106	232.306
hsa-miR-6833-3p	-1.54155	2.5035	-22.6639	1.12172e-106	4.63318e-106	231.68
hsa-miR-1226-3p	-1.52528	2.26728	-22.616	2.91589e-106	1.20052e-105	230.726
hsa-miR-4329	-1.58405	1.55372	-22.5125	2.28827e-105	9.33135e-105	228.67
hsa-miR-5587-3p	-1.62347	2.08259	-22.4868	3.81363e-105	1.55269e-104	228.16
hsa-miR-3615	-1.53248	1.84172	-22.4665	5.70458e-105	2.3189e-104	227.758
hsa-miR-4460	1.99787	0.951818	22.4504	7.84472e-105	3.17879e-104	227.44
hsa-miR-6878-3p	-1.59087	0.995604	-22.4448	8.76865e-105	3.54757e-104	227.329
hsa-miR-6814-3p	-1.62817	1.03501	-22.4171	1.51762e-104	6.13024e-104	226.782
hsa-miR-3977	1.57735	2.74766	22.3814	3.07614e-104	1.23866e-103	226.076
hsa-miR-7848-3p	-1.67175	0.675342	-22.38	3.16485e-104	1.27239e-103	226.048
hsa-miR-3190-3p	-1.5473	2.6071	-22.1841	1.50448e-102	6.00155e-102	222.194
hsa-miR-4793-3p	-1.61165	1.89142	-22.1471	3.10939e-102	1.23844e-101	221.469
hsa-miR-223-3p	1.58979	3.20089	22.0902	9.48516e-102	3.772e-101	220.356
hsa-miR-6758-5p	-1.58039	1.81853	-22.0585	1.76608e-101	7.01237e-101	219.736
hsa-miR-6868-3p	-1.57219	1.35388	-22.0292	3.13067e-101	1.23922e-100	219.164
hsa-miR-764	-1.52112	1.55815	-21.9686	1.02178e-100	4.0259e-100	217.984
hsa-miR-8075	-1.6311	1.68154	-21.8774	6.02984e-100	2.3577e-99	216.212
hsa-miR-586	1.69074	0.743156	21.7442	7.98614e-99	3.09433e-98	213.634
hsa-miR-379-5p	1.56117	0.308807	21.5645	2.55651e-97	9.77264e-97	210.174
hsa-miR-4300	1.61931	1.39717	21.3966	6.38106e-96	2.4248e-95	206.964
hsa-miR-1182	-1.52327	1.76652	-21.254	9.67067e-95	3.65321e-94	204.251
hsa-miR-3936	1.60885	0.888262	21.1456	7.55873e-94	2.83867e-93	202.199
hsa-miR-4786-5p	1.55229	1.46951	20.9405	3.61765e-92	1.34677e-91	198.339
hsa-miR-145-5p	1.58422	1.9702	20.3818	1.17094e-87	4.23023e-87	187.977
hsa-miR-518d-3p	1.66552	1.39074	20.3251	3.31993e-87	1.191e-86	186.938
hsa-miR-4711-3p	1.55385	0.817627	20.3182	3.76998e-87	1.35056e-86	186.811
hsa-let-7a-5p	1.75691	1.6565	20.274	8.47723e-87	3.02843e-86	186.002
hsa-miR-520h	1.57866	1.0226	20.1832	4.45773e-86	1.59028e-85	184.346
hsa-miR-5692b	1.53987	0.336324	19.9957	1.34689e-84	4.74555e-84	180.946
hsa-miR-3064-5p	1.51716	1.17933	19.1744	3.0378e-78	1.02257e-77	166.353
hsa-miR-24-1-5p	1.50353	1.74592	18.3289	6.22726e-72	2.00413e-71	151.859
